# Supplementary material for: Greater Engagement with Health Information Is Associated with Adoption and Maintenance of Healthy Lifestyle Behaviours in People with MS
Source: MDPI journal article supplement (doi:10.3390/ijerph17165935), 2020-08-15
Supplement: s1 [file s1]

**Table S1.** Sociodemographic and lifestyle characteristics of HOLISM main cohort by missingness at 5-year review.

| Cohort Characteristic      | Baseline, Completed 5-Year |         | Baseline, not Completed 5-Year |                      | 5-Year  |         |
|----------------------------|----------------------------|---------|--------------------------------|----------------------|---------|---------|
|                            | n = 952                    |         | n = 1514                       |                      | n = 952 |         |
|                            | Frequency (percentage)     |         |                                |                      |         |         |
| Sex                        |                            |         |                                |                      |         |         |
| Male                       | 163                        | (17.1%) | 252                            | (17.8%)              | 163     | (17.1%) |
| Female                     | 789                        | (82.9%) | 1161                           | (82.2%)              | 789     | (82.9%) |
| Education                  |                            |         |                                |                      |         |         |
| No/basic schooling         | 180                        | (19.0%) | 423                            | (28.1%)              | 126     | (13.3%) |
| Vocational training        | 126                        | (13.3%) | 270                            | (17.9%)              | 146     | (15.5%) |
| University degree          | 640                        | (67.7%) | 813                            | (54.0%) <sup>‡</sup> | 672     | (71.2%) |
| Employment                 |                            |         |                                |                      |         |         |
| Unemployed                 | 490                        | (51.6%) | 767                            | (51.0%)              | 145     | (15.4%) |
| Paid employment            | 247                        | (26.0%) | 283                            | (18.8%) <sup>+</sup> | 500     | (53.1%) |
| Retired                    | 212                        | (22.3%) | 455                            | (30.2%) <sup>+</sup> | 297     | (31.5%) |
| Marital status             |                            |         |                                |                      |         |         |
| Single                     | 117                        | (12.4%) | 240                            | (16.2%)              | 101     | (10.7%) |
| Married/partnered          | 743                        | (79.0%) | 1044                           | (70.3%) <sup>+</sup> | 725     | (77.0%) |
| Separated/divorced/widowed | 81                         | (8.6%)  | 202                            | (13.6%)              | 115     | (12.2%) |
| MS type                    |                            |         |                                |                      |         |         |
| Benign/RRMS                | 668                        | (80.3%) | 923                            | (73.4%)              | 668     | (80.3%) |
| SPMS/PPMS/PRMS             | 164                        | (19.7%) | 334                            | (26.6%) <sup>‡</sup> | 164     | (19.7%) |

|                                                       |     |         |     |           |     |         |
|-------------------------------------------------------|-----|---------|-----|-----------|-----|---------|
| <b>Disability (PDDS)</b>                              |     |         |     |           |     |         |
| Normal/mild                                           | 569 | (61.7%) | 694 | (50.4%)   | 558 | (58.6%) |
| Moderate                                              | 293 | (31.8%) | 502 | (36.5%) ‡ | 262 | (27.5%) |
| Severe                                                | 60  | (6.5%)  | 180 | (13.1%) ‡ | 132 | (13.9%) |
| <b>Clinical fatigue (FSS &gt; 5)</b>                  |     |         |     |           |     |         |
| No                                                    | 368 | (42.3%) | 367 | (28.9%)   | 382 | (41.6%) |
| Yes                                                   | 502 | (57.7%) | 901 | (71.1%) ‡ | 536 | (58.4%) |
| <b>BMI category</b>                                   |     |         |     |           |     |         |
| Underweight/normal                                    | 607 | (63.8%) | 794 | (53.3%)   | 564 | (59.2%) |
| Overweight                                            | 200 | (21.0%) | 356 | (23.9%) † | 223 | (23.4%) |
| Obese                                                 | 145 | (15.2%) | 340 | (22.8%) ‡ | 165 | (17.3%) |
| <b>Resource engagement</b>                            |     |         |     |           |     |         |
| None                                                  | 205 | (21.5%) | 590 | (39.0%)   | 122 | (12.8%) |
| Medium                                                | 605 | (63.6%) | 818 | (54.0%) ‡ | 609 | (64.0%) |
| High                                                  | 142 | (14.9%) | 106 | (7.0%) ‡  | 221 | (23.2%) |
| <b>Taking omega-3 supplements?</b>                    |     |         |     |           |     |         |
| No                                                    | 281 | (29.5%) | 717 | (47.4%)   | 366 | (38.4%) |
| Yes                                                   | 671 | (70.5%) | 797 | (52.6%) ‡ | 586 | (61.6%) |
| <b>Taking ≥ 5000 IU/d vitamin D supplement?</b>       |     |         |     |           |     |         |
| No                                                    | 460 | (48.9%) | 926 | (62.6%)   | 351 | (37.5%) |
| Yes                                                   | 480 | (51.1%) | 554 | (37.4%) ‡ | 585 | (62.5%) |
| <b>Seeking sun exposure to raise vitamin D level?</b> |     |         |     |           |     |         |
| No                                                    | 262 | (28.6%) | 485 | (36.2%)   | 363 | (38.9%) |

|                                                              |      |                   |      |                        |      |                   |
|--------------------------------------------------------------|------|-------------------|------|------------------------|------|-------------------|
| Yes                                                          | 653  | (71.4%)           | 854  | (63.8%) <sup>‡</sup>   | 569  | (61.1%)           |
| <b>Meditating ≥ 10 min/week?</b>                             |      |                   |      |                        |      |                   |
| No                                                           | 677  | (74.5%)           | 1037 | (79.1%)                | 640  | (75.7%)           |
| Yes                                                          | 232  | (25.5%)           | 274  | (20.9%) <sup>†</sup>   | 205  | (24.3%)           |
| <b>Vigorous physical activity ≥ 30 min/d ≥ 3 times/week?</b> |      |                   |      |                        |      |                   |
| No                                                           | 769  | (80.9%)           | 1301 | (85.9%)                | 734  | (77.2%)           |
| Yes                                                          | 182  | (19.1%)           | 213  | (14.1%) <sup>†</sup>   | 217  | (22.8%)           |
| <b>Smoking status?</b>                                       |      |                   |      |                        |      |                   |
| Non-/Ex- smokers                                             | 848  | (92.1%)           | 1159 | (84.8%)                | 896  | (94.2%)           |
| Current smokers                                              | 73   | (7.9%)            | 208  | (15.2%) <sup>‡</sup>   | 55   | (5.8%)            |
| <b>Consuming meat?</b>                                       |      |                   |      |                        |      |                   |
| No                                                           | 405  | (43.8%)           | 356  | (26.0%)                | 400  | (42.2%)           |
| Yes                                                          | 519  | (56.2%)           | 1014 | (74.0%) <sup>‡</sup>   | 548  | (57.8%)           |
| <b>Consuming dairy?</b>                                      |      |                   |      |                        |      |                   |
| No                                                           | 435  | (47.4%)           | 427  | (31.4%)                | 431  | (45.6%)           |
| Yes                                                          | 482  | (52.6%)           | 933  | (68.6%) <sup>‡</sup>   | 514  | (54.4%)           |
| <hr/>                                                        |      |                   |      |                        |      |                   |
| Mean (SD; range)                                             |      |                   |      |                        |      |                   |
| <b>Age, years</b>                                            | 45.9 | (10.4; 19.1–79.0) | 45.6 | (10.5; 18.0–75.3)      | 50.9 | (10.4; 23.8–84.1) |
| <hr/>                                                        |      |                   |      |                        |      |                   |
| Median (interquartile range)                                 |      |                   |      |                        |      |                   |
| <b>Duration since onset, years</b>                           | 11.5 | (5.5–19.5)        | 12.3 | (6.4–20.6)             | 16.5 | (10.5–24.6)       |
| <b>PDDS</b>                                                  | 1.0  | (0.0–3.0)         | 2.0  | (0.0–4.0) <sup>‡</sup> | 1.0  | (0.0–4.0)         |

**Note: Associations of baseline variables with missing 5-year review were assessed using log binomial regression.** <sup>†</sup>  $p < 0.05$  for associations with missingness at 5-year review. <sup>‡</sup>  $p < 0.001$  for associations with missingness at 5-year review. Abbreviations: BMI = Body mass index; PDDS = Patient determined disease steps; PPMS = Primary progressive multiple sclerosis; PRMS = Progressive-relapsing multiple sclerosis; RRMS = Relapsing-remitting multiple sclerosis.

**Table S2.** Associations of baseline resource engagement with lifestyle behaviours at five-year.

| 5-Year Lifestyle                                          |                         |                         |               |                   |               |                   |
|-----------------------------------------------------------|-------------------------|-------------------------|---------------|-------------------|---------------|-------------------|
|                                                           | No at 5-year            | Yes at 5-year           | Unadjusted    |                   | Adjusted *    |                   |
|                                                           | <i>n/N (Percentage)</i> | <i>n/N (Percentage)</i> | RR Est.       | (95%CI)           | RR Est.       | (95%CI)           |
| Taking omega-3 supplement?                                |                         |                         |               |                   |               |                   |
| <b>Engagement</b>                                         |                         |                         |               |                   |               |                   |
| None                                                      | 109/366 (29.8%)         | 96/586 (16.4%)          | Ref           |                   | Ref           |                   |
| Medium                                                    | 227/366 (62.0%)         | 378/586 (64.5%)         | 1.33          | (1.14, 1.56)      | 1.39          | (1.15, 1.67)      |
| High                                                      | 30/366 (8.2%)           | 112/586 (19.1%)         | 1.68          | (1.42, 1.99)      | 1.72          | (1.42, 2.09)      |
|                                                           |                         |                         | <i>PTREND</i> | <i>&lt; 0.001</i> | <i>PTREND</i> | <i>&lt; 0.001</i> |
| Taking ≥ 5000 IU/d vitamin D supplement?                  |                         |                         |               |                   |               |                   |
| <b>Engagement</b>                                         |                         |                         |               |                   |               |                   |
| None                                                      | 100/351 (28.5%)         | 101/585 (17.3%)         | Ref           |                   | Ref           |                   |
| Medium                                                    | 224/351 (63.8%)         | 372/585 (63.6%)         | 1.24          | (1.07, 1.44)      | 1.29          | (1.08, 1.54)      |
| High                                                      | 27/351 (7.7%)           | 112/585 (19.1%)         | 1.60          | (1.37, 1.88)      | 1.66          | (1.37, 2.00)      |
|                                                           |                         |                         | <i>PTREND</i> | <i>&lt; 0.001</i> | <i>PTREND</i> | <i>&lt; 0.001</i> |
| Seeking sun exposure to raise vitamin D level?            |                         |                         |               |                   |               |                   |
| <b>Engagement</b>                                         |                         |                         |               |                   |               |                   |
| None                                                      | 96/363 (26.4%)          | 107/569 (18.8%)         | Ref           |                   | Ref           |                   |
| Medium                                                    | 221/363 (60.9%)         | 371/569 (65.2%)         | 1.19          | (1.03, 1.37)      | 1.26          | (1.05, 1.50)      |
| High                                                      | 46/363 (12.7%)          | 91/569 (16.0%)          | 1.26          | (1.06, 1.50)      | 1.30          | (1.06, 1.60)      |
|                                                           |                         |                         | <i>PTREND</i> | <i>= 0.007</i>    | <i>PTREND</i> | <i>= 0.010</i>    |
| Meditating ≥ 10 min/week?                                 |                         |                         |               |                   |               |                   |
| <b>Engagement</b>                                         |                         |                         |               |                   |               |                   |
| None                                                      | 151/640 (23.6%)         | 36/205 (17.6%)          | Ref           |                   | Ref           |                   |
| Medium                                                    | 418/640 (65.3%)         | 121/205 (59.0%)         | 1.17          | (0.84, 1.63)      | 1.21          | (0.83, 1.76)      |
| High                                                      | 71/640 (11.1%)          | 48/205 (23.4%)          | 2.10          | (1.45, 3.02)      | 2.03          | (1.36, 3.05)      |
|                                                           |                         |                         | <i>PTREND</i> | <i>&lt; 0.001</i> | <i>PTREND</i> | <i>= 0.001</i>    |
| Vigorous physical activity ≥ 30 min/d for ≥ 3 times/week? |                         |                         |               |                   |               |                   |
| <b>Engagement</b>                                         |                         |                         |               |                   |               |                   |
| None                                                      | 170/734 (23.2%)         | 35/217 (16.1%)          | Ref           |                   | Ref           |                   |
| Medium                                                    | 458/734 (62.4%)         | 147/217 (67.7%)         | 1.42          | (1.02, 1.99)      | 1.10          | (0.76, 1.59)      |
| High                                                      | 106/734 (14.4%)         | 35/217 (16.1%)          | 1.45          | (0.96, 2.21)      | 1.10          | (0.71, 1.71)      |
|                                                           |                         |                         | <i>PTREND</i> | <i>= 0.050</i>    | <i>PTREND</i> | <i>= 0.696</i>    |
| Current smoker?                                           |                         |                         |               |                   |               |                   |
| <b>Engagement</b>                                         |                         |                         |               |                   |               |                   |
| None                                                      | 181/896 (20.2%)         | 23/55 (41.8%)           | Ref           |                   | Ref           |                   |
| Medium                                                    | 575/896 (64.2%)         | 30/55 (54.6%)           | 0.44          | (0.26, 0.74)      | 0.41          | (0.22, 0.75)      |
| High                                                      | 140/896 (15.6%)         | 2/55 (3.6%)             | 0.12          | (0.03, 0.52)      | 0.16          | (0.04, 0.68)      |
|                                                           |                         |                         | <i>PTREND</i> | <i>&lt; 0.001</i> | <i>PTREND</i> | <i>&lt; 0.001</i> |
| Consuming dairy?                                          |                         |                         |               |                   |               |                   |

|                                                                                                                                                                                     |                 |                 |               |                     |               |                     |
|-------------------------------------------------------------------------------------------------------------------------------------------------------------------------------------|-----------------|-----------------|---------------|---------------------|---------------|---------------------|
| <b>Engagement</b>                                                                                                                                                                   |                 |                 |               |                     |               |                     |
| None                                                                                                                                                                                | 34/431 (7.9%)   | 169/514 (32.9%) | Ref           |                     | Ref           |                     |
| Medium                                                                                                                                                                              | 292/431 (67.8%) | 309/514 (60.1%) | <b>0.62</b>   | <b>(0.56, 0.68)</b> | <b>0.64</b>   | <b>(0.57, 0.71)</b> |
| High                                                                                                                                                                                | 105/431 (24.4%) | 36/514 (7.0%)   | <b>0.31</b>   | <b>(0.23, 0.41)</b> | <b>0.31</b>   | <b>(0.23, 0.42)</b> |
|                                                                                                                                                                                     |                 |                 | <i>PTREND</i> | <b>&lt; 0.001</b>   | <i>PTREND</i> | <b>&lt; 0.001</b>   |
| <hr/>                                                                                                                                                                               |                 |                 |               |                     |               |                     |
| <b>Consuming meat?</b>                                                                                                                                                              |                 |                 |               |                     |               |                     |
| <b>Engagement</b>                                                                                                                                                                   |                 |                 |               |                     |               |                     |
| None                                                                                                                                                                                | 29/400 (7.3%)   | 175/548 (31.9%) | Ref           |                     | Ref           |                     |
| Medium                                                                                                                                                                              | 266/400 (66.5%) | 338/548 (61.7%) | <b>0.65</b>   | <b>(0.60, 0.71)</b> | <b>0.68</b>   | <b>(0.62, 0.76)</b> |
| High                                                                                                                                                                                | 105/400 (26.3%) | 35/548 (6.4%)   | <b>0.29</b>   | <b>(0.22, 0.39)</b> | <b>0.29</b>   | <b>(0.21, 0.40)</b> |
|                                                                                                                                                                                     |                 |                 | <i>PTREND</i> | <b>&lt; 0.001</b>   | <i>PTREND</i> | <b>&lt; 0.001</b>   |
| <hr/>                                                                                                                                                                               |                 |                 |               |                     |               |                     |
| Note: Associations with <i>p</i> -value < 0.050 are shown in bold. * Adjusted for baseline age, sex, education, employment, clinical fatigue, disability, and duration since onset. |                 |                 |               |                     |               |                     |
